1 **Linking the chemistry and reactivity of dissolved organic matter from low-latitude glaciers**  
2 **and rock glaciers**

3

4

5 **Fegel, Timothy<sup>1</sup>, Boot, Claudia M.<sup>1,2</sup>, Baron, Jill S.<sup>1,3</sup>, Hall, Ed K.<sup>1,4</sup>**

6 1. Natural Resource Ecology Laboratory, Colorado State University, 2. Department of  
7 Chemistry, Colorado State University 3. U.S. Geological Survey 4. Department of Ecosystem  
8 Science and Sustainability, Colorado State University

9

10

11

12

13

14

15

16

17

18

19

20

21 **Keywords:** glaciers, dissolved organic matter, chemodiversity, GC-MS, DOM, molecular

22 composition, lability, bacterial growth efficiency, BGE, subsidies, heterotrophy, alpine

23

24 ***Abstract***

25 As glaciers in the western United States thaw in response to warming, they release dissolved  
26 organic matter (DOM) to alpine lakes and streams. Biological availability of DOM from small  
27 mountain glaciers is unknown. Differences in DOM bioavailability between glacier types like  
28 rock and ice glaciers remains undefined, yet rock glaciers outnumber ice glacier approximately  
29 ten to one at low latitudes. To assess which components of aquatic DOM are most reactive and  
30 the potential for glacial DOM from low latitude glaciers to subsidize heterotrophy in alpine  
31 headwaters we evaluated reactivity and molecular composition of DOM from ice glaciers and  
32 rock glaciers from four paired catchments (each with a glacier and rock glacier at their  
33 headwaters). Biological reactivity was linked to molecular composition by evaluating the  
34 chemical characteristics of each DOM pool pre- and post-incubation using common microbial  
35 community laboratory assays paired with untargeted mass spectrometry-based metabolomics.  
36 Glacier and rock glacier DOM was similar in concentration and chemodiversity, but differed in  
37 composition. When incubated with a common microbial community, DOM from ice glacier  
38 meltwaters contained a higher proportion of bioavailable DOM (BDOM), and resulted in greater  
39 bacterial growth efficiency. Differences in DOM reactivity between glacier types was  
40 determined by differences in the relative abundance of only a few dozen compounds. Though  
41 BDOM was lower in rock glaciers, because rock glaciers are more abundant and are expected to  
42 have greater longevity, we propose that both glacial types will be important sources of  
43 bioavailable DOM to alpine headwaters over the coming years to decades.

44

45 ***Introduction***

46       Glaciers bridge the atmospheric-terrestrial-aquatic interface, integrating atmospherically  
47 deposited chemicals with weathering products and releasing reactive solutes to adjacent surface  
48 waters (Williams et al. 2007; Dubnick et al. 2010; Fellman et al. 2010; Stibal et al. 2010;  
49 Stubbins et al. 2012). Between continental and mountain glaciers, mountain glaciers release the  
50 largest flux of carbon from melting ice annually (Hood et al. 2015). Dissolved organic matter  
51 (DOM) from these large mountain glaciers of the European Alps and Alaska has been shown to  
52 stimulate heterotrophic respiration (Hood et al. 2009; Singer et al. 2012). Glaciers and rock  
53 glaciers, each with distinct geophysical attributes, are common in many of the alpine headwaters  
54 of the western U.S. (Fegel et al. 2016). Glaciers are massive ice bodies that form and persist in  
55 areas where annual snow accumulation is greater than annual snow ablation at decadal or longer  
56 time spans. Rock glaciers are flowing bodies of permafrost, composed of coarse talus and  
57 granular regolith both bound and lubricated by interstitial ice (Berthling, 2011). In the western  
58 United States, rock glaciers are an order of magnitude more abundant than ice glaciers and are  
59 more resistant to warming temperatures than ice glaciers (Fegel et al. 2016). Yet little is known  
60 about the quantity or quality of DOM being released from smaller glaciers or rock glaciers in  
61 mountain headwater ecosystems or their potential to affect low-latitude alpine ecosystems.

62       The chemical composition of DOM from natural aquatic systems is complex (Hedges et al.  
63 2000; Kim et al. 2006; Hockaday et al. 2009), and glacier and rock glacier meltwaters are not  
64 likely to be an exception. Previously, assessment of the bioavailability of DOM relied on  
65 bioassays that measure the rate and amount of DOM consumed over time (e.g. Amon and Benner  
66 1996; del Giorgio and Cole 1998; Guillemette and del Giorgio 2011). While some coarse  
67 characterizations of molecular composition (Benner 2002; Berggren and del Giorgio 2015) or the

68 lability of individual compounds (del Giorgio and Cole 1998) have previously been applied to  
69 characterize bioavailable DOM (BDOM), only recently has the research community begun to  
70 apply high-resolution analytical chemistry to assess the molecular characteristics of  
71 environmental DOM (e.g. Kellerman et al. 2014, 2015; Andrilli et al. 2015). Whereas no single  
72 method can identify the entire spectrum of compounds present in an environmental DOM pool  
73 (Derenne and Tu 2014), mass spectrometry allows for molecular identification of thousands of  
74 specific DOM compounds, simultaneously yielding a more specific and broader metric for DOM  
75 analysis compared to spectroscopic techniques such as fluorescence or ultraviolet absorption.

76 Simultaneous identification and quantification of total BDOM is not an easy task. Difficulties  
77 in experimentally connecting molecular characterization of DOM pools to their bioavailability  
78 are partly due to the highly diverse constituent compounds that compose natural DOM (Derenne  
79 and Tu 2014). The effects of individual compounds identified to be bioavailable (e.g. amino  
80 acids in glacial meltwaters (Feghel et al. 2016) may not be representative of the total BDOM pool.  
81 It is also possible that DOM with a high diversity of labile compounds may have positive  
82 feedbacks on the bioavailability of the total DOM pool by asserting priming effects on the total  
83 pool (Guenet et al. 2010). In addition, certain metabolites within DOM pools may not be  
84 bioavailable individually, but may act as cofactor metabolites that allow for a mutualistic  
85 increase in bioavailability [Hilker 2014]. Thus, the relationship between DOM pool  
86 characteristics and lability remains largely unknown in most natural systems. However, some  
87 patterns are beginning to emerge, like the consistently high lability of proteinaceous DOM that  
88 has been found in glacial, estuarine, and marine environments [Andrilli et al. 2015]. Defining  
89 these fundamental relationships between chemical composition of DOM and lability has the

90 potential to provide a better understanding for how DOM pools contribute to heterotrophy across  
91 a broad spectrum of aquatic ecosystems.

92 There are defining characteristics in the origin of DOM that differentiate glaciers from rock  
93 glaciers. DOM derived from ice glaciers is structured by in situ microbial activity and can be an  
94 important source of chemical energy to headwater ecosystems (Hood et al. 2009; Singer et al.  
95 2012; Fellman et al. 2015; Feghel et al. 2016). DOM derived from rock glaciers is a  
96 conglomeration of carbon compounds percolated through from vegetation growing on the rock  
97 glacier surface and microbial processing within the rock glacier itself (Wahrhaftig and Cox,  
98 1959; Williams et al. 2007; Feghel et al. 2016). Previous research has shown that DOM released  
99 from glaciers and rock glaciers in the western United States differ in their optical properties  
100 (Feghel et al. 2016). Whether or not these differences in the optical properties of DOM between  
101 glacial types translates to differences in their reactivity or proportion of BDOM remains  
102 unknown.

103 To address this, we asked whether differences in the composition of DOM between ice  
104 glaciers and rock glaciers affected differences in microbial metabolism and whether DOM  
105 chemistry in ice and rock glacier meltwater in the western United States is similar to what has  
106 been reported for other glacial meltwaters. Here we present the results of laboratory incubations  
107 of DOM from ice glacier and rock glacier meltwaters with a common microbial community.  
108 Incubations were bookended (i.e. analyzed before and after incubation) with non-targeted  
109 metabolomic analysis of DOM via gas chromatography mass spectrometry (GC-MS) to  
110 determine differences in the specific chemical compounds metabolized by microbial processing.  
111 By exposing DOM from different sources to a common microbial community we were able to

112 assess the lability of each DOM source and analyze which differences in the molecular  
113 composition of DOM affected its lability and carbon use efficiency.

## 114 *Methods*

### 115 **Site Description**

116 Paired ice glaciers and rock glaciers within four watersheds on the Front Range of Northern  
117 Colorado were selected based on their size ( $>0.5\text{km}^2$ ) and the proximity to each other within the  
118 watershed, forming pairs of features with similar geographic parameters (Figure 1). We collected  
119 samples of glacier meltwater in the late summer to capture the greatest contribution of ice melt  
120 and minimize annual snowmelt contribution. We sampled the four pairs in September 2014.  
121 Sample sites were: Isabelle Glacier (-105.640994,40.063373) and Navajo Rock Glacier (-  
122 105.636092,40.061200), Arapaho Glacier (-105.646351,40.023378) and Arapaho Rock Glacier  
123 (-105.637699, 40.022482), Peck Glacier (-105.663810,40.068332) and Peck Rock Glacier (-  
124 105.664310,40.071642) in the Indian Peaks Wilderness west of Boulder, CO; and Andrews  
125 Glacier (-105.680639,40.288370) and Taylor Rock Glacier (-105.671197,40.275568) in the Loch  
126 Vale Watershed in Rocky Mountain National Park (Figure 1a). A complete site description for  
127 each site is given in Fegel et al. (2016).

### 128 **Field extraction of DOM**

129 At each glacier, meltwaters were collected in the early to mid-morning (0500-1000) to  
130 minimize diurnal variability in ice melt from solar radiation. DOM was extracted from 20 L of  
131 meltwater collected at the terminus of each feature in the field using a slightly modified protocol  
132 established by Dittmar et al. (2008, Supplemental Information). Briefly, meltwater samples were  
133 passed through pre-combusted (450° C, 5hr) Whatman GF/F filters (GE Whatman, Pittsburg,  
134 PA, USA), acidified to ~ pH 2 with 32% HCl, and concentrated using Bond Elut PPL carbon

135 extraction cartridges (Agilent, Santa Clara, CA, USA). Concentrated DOM was eluted in the  
136 field with 10mL HPLC grade methanol per cartridge into cleaned, combusted, and pre-weighed  
137 120mL borosilicate bottles.

### 138 **Metabolite Analyses**

139 Once in the laboratory, pre-incubation DOM samples were dried under a clean N<sub>2</sub> stream and  
140 weighed (<http://www.nrel.colostate.edu/projects/lvws/data.html>). Each sample (n=8) was  
141 prepared for metabolomic analysis by dissolving the dried OM into fresh HPLC-grade methanol  
142 to a final concentration of 2 mg ml<sup>-1</sup>.

143 After the microbial bioassays (in which all samples were run in duplicate), post-incubation  
144 DOM samples were collected separately from each individual microcosm (n=16). Water from  
145 each microcosm was filtered through pre-leached 0.2 µm Millipore filters (EMD Millipore,  
146 Billerica, MA, USA) to remove microbial biomass, freeze-dried, and the total remaining DOM  
147 was weighed and re-dissolved into HPLC-grade methanol  
148 (<http://www.nrel.colostate.edu/projects/lvws/data.html>). In order to increase the volatility of  
149 molecules analyzed through GC-MS, samples were derivatized with trimethylsilane (TMS) using  
150 standard protocols (Supplemental Materials) (Pierce, 1968).

### 151 **Metabolomics**

152 Both pre- and post- incubation OM samples were analyzed with inline gas chromatography-  
153 mass spectroscopy (GC-MS) at the Proteomics and Metabolomics Facility at Colorado State  
154 University. Metabolites were detected using a Trace GC Ultra coupled to a Thermo ISQ mass  
155 spectrometer (Thermo Scientific, Waltham, MA, USA). Samples were injected in a 1:10 split  
156 ratio twice in discrete randomized blocks. Separation occurred using a 30 m TG-5MS column  
157 (0.25 mm i.d., 0.25 µm film thickness, Thermo Scientific, Waltham, MA, USA) with a 1.2 mL

158 min<sup>-1</sup> helium gas flow rate, and the program consisted of 80°C for 30 sec, a ramp of 15°C per  
159 min to 330°C, and an 8 min hold. Masses between 50-650 m/z were scanned at 5 scans sec<sup>-1</sup> after  
160 electron impact ionization (Broeckling et al. 2014).

### 161 **DOM lability experiments**

162 Concentrated DOM samples from each of the eight study sites were diluted to 4 mg L<sup>-1</sup> C and  
163 incubated *in vitro* with a natural microbial community collected from The Loch, a small sub-  
164 alpine lake in Rocky Mountain National Park, CO, USA, (-105.6455, 40.2976). Unfiltered lake  
165 water collected from The Loch was aged for 2 years at 5 °C in order to remove the majority of  
166 the bioavailable carbon. At the start of the experiment DOM concentration of the lake water was  
167 0.7 mg L<sup>-1</sup> C. At the initiation of the incubations 2 L of aged lake water was filtered through a  
168 pre-combusted (450° C, 5hr) Whatman GF/C filter (1.2µm nominal pore size) (GE Whatman,  
169 Pittsburg, PA, USA) to remove bacterial grazers (e.g. protists and metazoans). Three aliquots of  
170 filtered-aged lake water was preserved with 2% formalin (37% formaldehyde), and set aside for  
171 enumeration of bacteria at the initiation of the experiment (i.e. t=0), and a second set of three  
172 aliquots (7mL) was used for initial DOC/TN analysis on a Shimadzu TOC-VWS analyzer  
173 (Shimadzu Corp., Kyoto, Japan). To create normalized concentrations (4 mg L<sup>-1</sup> C), in each  
174 incubation bottle we added 60.96 mL of unfiltered Loch water, between 3.80 and 9.06mL of  
175 concentrated DOC solution (depending on the initial concentration), and filled to 70mL total  
176 volume with DI; resulting in standardized concentrations of 4 mg L<sup>-1</sup> C in each incubation bottle.  
177 During the experiment, microcosms that received DOM from ice glacier and rock glacier sites  
178 were incubated alongside control incubations that contained lake water and the common  
179 microbial community but with no added DOM (i.e. experimental control). In addition, an



180 analytical blank of MilliQ water was incubated to correct for any instrumental drift that occurred  
181 during the experiment.

182 All microcosms were incubated simultaneously at 15 °C for 10 weeks. To calculate microbial  
183 respiration, we measured changes in dissolved oxygen (DO) at 1-minute intervals in each  
184 microcosm using an Oxy-4 fiber-optic dissolved oxygen probe (PreSens, Regensburg, Germany).  
185 The incubation was terminated when the fastest metabolizing microcosm approached 4mg L<sup>-1</sup>  
186 DO to avoid hypoxia and the potential for anaerobic metabolism. All measurements with  
187 amplitude less than 20000 amps were removed because of the potential for inaccurate readings of  
188 DO. Absolute values from the raw fiber optic measurements were corrected for analytical drift  
189 by subtraction of changes in signal from the MilliQ water analytical control over the course of  
190 the experiment.

### 191 **Bacterial Cell Counts and Bulk Chemistry**

192 From each microcosm we collected a 2 mL aliquot post-incubation and preserved it with 2%  
193 formalin (final concentration) to assess changes in cell abundance during the course of the  
194 incubation. Aliquots were filtered onto 0.2 µm Millipore polycarbonate filters (EMD Millipore,  
195 Billerica, MA, USA) and stained with Acridine Orange (Hobbie et al. 1977, Supplemental  
196 Information) for enumeration. Post-incubation we assessed TOC and TDN  
197 (<http://www.nrel.colostate.edu/projects/lvws/data.html>) for each microcosm. To ensure that  
198 filtration did not contribute significant additional carbon to the dissolved carbon pool, a subset of  
199 blank Millipore filters flushed with MilliQ was analyzed for TOC and TN. All filtration of  
200 microcosm water for chemical analysis was conducted on pre-leached Millipore filters that  
201 contributed insignificant amounts of carbon to the filtrate  
202 (<http://www.nrel.colostate.edu/projects/lvws/data.html>).

## 203 **Data Analysis**

### 204 *Metabolite Analysis*

205 Compound annotation was prioritized based on order of normalized intensity and statistical  
206 difference between glacier types. Putative identification (candidate compounds based on  
207 physicochemical characteristics and spectral similarity with spectral libraries (Sumner et al.  
208 2007), was made using spectral matching to in-house, NISTv12, Golm, Metlin, and Massbank  
209 metabolite databases. Clustered features assigned candidate compounds in our study had high  
210 similarity (>90%) to spectra from known standard compounds within the databases used  
211 (Supplemental Information). Molecular rank was calculated by ordering candidate compounds  
212 by their normalized ion intensity for pre- and post- incubation sample averages for all features.  
213 Chemical diversity was calculated using the Shannon-Wiener diversity index (Shannon 1948) by  
214 treating each unique chemical compound identified through GC-MS as a 'species'. This was done  
215 for DOM composition both before and after incubation in order to estimate changes in chemical  
216 diversity through microbial metabolism.

### 217 *Analysis of DOM Reactivity*

218 Oxygen consumption rates were fit to a Berner-Multi-G two-pool decay model to estimate the  
219 size of the labile pool (BDOM) and the recalcitrant pool. Oxygen consumption was averaged for  
220 each glacier type and confidence intervals were calculated at  $\alpha=0.05$ . Data were smoothed using  
221 a third order polynomial ( $R^2>0.999$ ) and 95% confidence intervals were plotted. Berner's Multi-  
222 G model was used to model carbon pool bioavailability (Berner 1980; Guillemette and del  
223 Giorgio 2011), using SAS. Dissolved oxygen curves generated from the incubation were fit to  
224 the Equation:

225

226 
$$Y = B_1^{kt} + B_0$$

227

228 where Y is the total carbon pool, B<sub>1</sub> is the bioavailable carbon pool, k is the decay rate  
229 constant of the bioavailable pool, t is time, and B<sub>0</sub> is the recalcitrant carbon pool. We used a least  
230 square means to test for statistical differences between ice glaciers and rock glaciers in the size  
231 of the B<sub>1</sub> and B<sub>0</sub> pools. Total C consumed was calculated as the difference in pre- and post-  
232 incubation DOC values.

233 To address the metabolic quality of consumed carbon we calculated Respiratory Quotient  
234 (RQ) as the carbon consumed (in mg L<sup>-1</sup>) divided by the oxygen (as O<sub>2</sub>) consumed (in mg L<sup>-1</sup>).

235 Bacterial growth efficiency (BGE) was calculated to examine how efficiently each carbon  
236 source was incorporated into bacterial biomass. To calculate BGE we divided bacterial  
237 production (BP) by the sum of bacterial respiration and bacterial production (BR + BP)(del  
238 Giorgio and Cole 1998). Thus, BGE is a ratio of carbon incorporated into biomass relative to  
239 total carbon consumed for the bacterial community. BP was measured as change in cell number  
240 over time and converted to units C using an estimate of 20 fg C per bacterial cell (Borsheim and  
241 Bratbak 1987) as a conversion. Carbon consumption rate was measured as carbon consumed  
242 during the course of the incubation by measuring DOC content in each filtered pre- and post-  
243 incubation sample using a TOC/TDN analyzer.

244

245

246

247

248

## 249 **Statistical Analyses**

250 The DOM composition for each treatment (glaciers vs. rock glaciers) was compared with  
251 ANOVA for each compound using the aov function in R, and p-values were adjusted for false  
252 positives using the Bonferroni-Hochberg method in the p.adjust function. Post-incubation  
253 samples were corrected for compounds added by the lake water by subtracting the peak  
254 intensities for each chemical candidate within the lake water (i.e. experimental control) from  
255 each post incubation sample.

256 We identified differences in compounds present in each sample using PCA conducted on  
257 mean-centered and pareto variance-scaled data using the pcaMethods package in R. We analyzed  
258 GC-MS spectra using principal component analysis (PCA) in R (R Core Team, 2014). For each  
259 sample, raw data files were converted to .cdf format, and a matrix of molecular features as  
260 defined by retention time and mass to charge ratio (m/z) was generated using XCMS package in  
261 R for feature detection and alignment. Raw peak areas were normalized to total ion signal,  
262 outlier features were detected based on total signal and PC1 of PCA, and the mean area of the  
263 chromatographic peak was calculated among replicate injections (n=2). We grouped all spectral  
264 features based on an in-house clustering tool, RAMClustR, which uses spectra based coelution  
265 and covariance across the full dataset groups features (Broeckling et al. 2014). We used the t-test  
266 configured for non-parametric Welch-Satterthwaite test to compare differences in RQ, BGE,  
267 chemodiversity, and loss of chemodiversity between glacier types. Our use of a Welch-  
268 Satterthwaite test allowed for comparison of samples of unequal variance and distribution.

269

270

271

272 **Results**

273 **Ice glacier and rock glacier DOM composition**

274 Neither the chemical diversity (mean=2.82), nor the C:N ratio (mean=2.1) differed between  
275 glaciers and rock glaciers (Table 1). In addition, the molecular composition was similar in each  
276 glacier type for the top 25 most abundant molecules. Combined, the glacier and rock glacier  
277 DOM molecular composition consisted of 2033 compounds. Each individual compound  
278 consisted of 3 to 170 individual mass spectral features, for a total of 14,571 unique mass spectral  
279 features in the complete dataset. Of the 2033 compounds, 328 were chosen for annotation based  
280 either on high ion intensity (n=278) or significantly different relative abundances between glacier  
281 and rock glacier sources (n=33). Annotated compounds consisted primarily of simple sugars,  
282 amino acids and other organic acids (<http://www.nrel.colostate.edu/projects/lvws/data.html>).

283 There were significant differences between glacier types in the molecular composition of less  
284 abundant compounds (Table 2), although the C:N ratio, chemical diversity, and compounds with  
285 greatest ion intensity were similar. PCA analysis of the complete dataset suggested 33 key  
286 compounds, ordinated on axes three and five of our PCA analysis (Figure 2A), were responsible  
287 for differences in the ice and rock glacier DOM pools (Table 2). Of those 33 compounds, 5 were  
288 assigned putative structures (Table 2, also see  
289 <http://www.nrel.colostate.edu/projects/lvws/data.html>) with ice glacier meltwaters significantly  
290 enriched in the simple sugar maltose and the amino acid glutamate, and rock glacier meltwaters  
291 enriched in the primary organic acids, glycolate, threonate and quinate (Table 2). The other 28  
292 compounds represented components of the DOM pool that differentiated DOM composition  
293 from each glacier type, but were not present in the databases we employed and had no known  
294 structural analogs.

## 295 **Incubations**

296 The bacterial respiration rates of DOM from each glacier type were not significantly different,  
297 as estimated by the decay constant  $k$  (Table 3). However, a significantly larger portion of ice  
298 glacier DOM was bioavailable, (i.e. BDOM,  $B_1 = 58.8 \pm 9.7\%$ ) compared to rock glacier DOM  
299 ( $B_1 = 37.3 \pm 10.2\%$ ,  $p < 0.01$ , Table 3). Bacterial growth efficiency (BGE) was higher for  
300 microbial communities incubated with ice glacier DOM compared to rock glacier DOM ( $G =$   
301  $0.26 \pm 0.13$ ,  $RG = 0.16 \pm 0.16$ , Table 3). In general, more oxygen was consumed per mg organic  
302 carbon metabolized in incubations that contained glacial DOM compared to those that contained  
303 rock glacier DOM, even though the amount of carbon consumed between treatments was similar  
304 (Figure 4, Table 3). This resulted in a lower respiratory quotient (RQ) for glacial derived DOM  
305 compared to rock glacier derived DOM overall.

## 306 **Post-incubation DOM analysis**

307 Analysis of DOM after the incubation period allowed us to assess how microbial metabolism  
308 altered the composition of DOM. Incubation with a common microbial community both rarified  
309 and homogenized DOM between glacier types, resulting in fewer compounds with high ion  
310 intensities, and more compounds with low ion intensities (Figure 3). This reorganized the  
311 molecular rank-abundance curve, resulting in a different set of compounds with the highest  
312 relative abundance in the pre vs. post-incubation dataset (Table 4). However, similar to pre-  
313 incubation DOM composition, post-incubation ice glacier and rock glacier derived DOM shared  
314 the same abundant compounds (Figure 2B)  
315 (<http://www.nrel.colostate.edu/projects/lvws/data.html>). Interestingly, the chemical diversity of  
316 DOM between glacier types diverged during the course of the incubation. At the end of the  
317 incubation glacial DOM had significantly higher diversity and rock glacier DOM had

318 significantly lower diversity compared to pre-incubation DOM for the same glacial type (Table  
319 1, Figure 2C). Combined with molecular rank abundance data (ordered on ion intensity), this  
320 change in chemical diversity resulted in an increase in the richness of glacier DOM pools by  
321 microbial metabolism and a decrease in richness in rock glacier DOM during the incubation. For  
322 both DOM sources, many of the organic acids and sugars present pre-incubation were consumed  
323 while amino acids that were present at lower intensities in pre-incubation DOM pools increased  
324 in relative abundance in post-incubation DOM pools. While there were differences in the  
325 chemical diversity of rock and ice glacier derived DOM post-incubation, PCA suggested were no  
326 differences in the overall molecular composition between glacier types (Figure 2B). This trend  
327 did not follow for all rock glaciers, as one replicate of Taylor Rock Glacier (lowest left point,  
328 Figure 2A & 2B) saw few changes in its principal components after the incubation. Interestingly,  
329 while no significant difference was seen in GC-MS compounds between glacier type post  
330 incubation (Figure 2B), both replicates of Peck Rock Glacier (lower rightmost points Figure 2B)  
331 showed separation along the y-axis (PC1) of their PCA, a separation that was not seen before  
332 microbial metabolism (Figure 2A). The reasons for this remain unclear, but may be due  
333 geographical separation (climatological differences) between Peck Rock Glacier and all other  
334 sites.

### 335 *Discussion*

336 Our results demonstrate that chemically complex DOM released from Rocky Mountain ice  
337 glaciers and rock glaciers stimulated bacterial respiration and productivity. Each DOM source  
338 had unique molecular characteristics that reflected their quality as an energy source for microbial  
339 metabolism. Glacier and rock glacier DOM shared many of the same organic compounds, but  
340 differences in the relative concentrations of just 33 compounds appeared to drive differences in

341 the bioavailability of DOM between glacier types. Enrichment in simple sugars of glacier DOM  
342 contributed to higher bioavailability of glacier DOM as measured by size of the BDOM pool and  
343 bacterial growth efficiency (BGE). The DOM from rock glaciers, was enriched in less  
344 bioavailable, primary organic acids. In spite of these differences, the bacteria homogenized  
345 DOM from both sources during the incubations, resulting in more similar DOM composition at  
346 the end of the incubation compared to the composition of the DOM before the incubation. In our  
347 experiment, the source of the DOM affected its composition and reactivity and interaction with  
348 the microbial community metabolism re-structured its chemistry.

### 349 **Glaciers are a source of labile DOM**

350 The results from our study of glaciers in Colorado showed similar patterns to previous studies  
351 of glacial DOM in the Arctic and the European Alps, where bioavailable carbon from glaciers  
352 also stimulated microbial production (Hood et al. 2009; Singer et al. 2012; Fellman et al. 2015).  
353 Carbon concentrations in meltwaters from ice and rock glaciers in our study were low (0.5- 1.5  
354 mg C L<sup>-1</sup>), but similar to the global average of 0.97 mg C L<sup>-1</sup> that has been previously reported  
355 for glaciers (Dubnick et al. 2010; Stubbins 2012; Singer et al. 2012; Hood et al. 2015). The  
356 percentage of DOM that was bioavailable (BDOM) from ice glacier DOM in our study (~50%)  
357 was comparable to values of BDOM seen in DOM derived from glaciers in the European Alps  
358 (58%), and within the range of values reported from glaciers in the Alaskan Range (23-66%)  
359 (Hood et al. 2009; Singer et al. 2012). In all of these studies, including the results reported here,  
360 glaciers had higher BDOM concentrations than other surficial freshwaters (Volk et al. 1997).  
361 Previous reports on freshwater noted 16.5-34.5% of BDOM, which more closely resembled the  
362 amount of BDOM we report from rock glacier BDOM (37% on average).



363 We propose that ice glaciers have higher proportions of BDOM compared to rock glaciers for  
364 two reasons. First, rock glaciers host mosses, lichens, and vascular plants, including woody  
365 shrubs and trees (Wahrhaftig and Cox, 1959; Cannone and Gerdol 2003; Burga et al. 2004).  
366 Dissolved organic compounds released from these allochthonous phototrophs include a wide  
367 variety of complex organic acids and polymers that are potentially difficult for microbes in  
368 freshwaters to metabolize, resulting in a higher proportion of recalcitrant DOM within rock  
369 glaciers (Wetzel 1992, Rovira and Vallejo 2002). The potential for the development of proto soils  
370 within the rock glacier matrix may promote the presence of liquid pore water. DOM from rock  
371 glaciers may already be partially processed by microbes within this proto soil environment by the  
372 time it reaches the sub-rock-glacial surface water. This pre-processing may result in DOM with a  
373 level of lability more similar to what is delivered to inland surface waters and derived from the  
374 soil SOM matrix (Fellman et al. 2010). Conversely, BDOM in ice glaciers comes from  
375 autochthonous sources (i.e. microbial production and processing on the ice surface and within the  
376 ice interstitial space (Fellman et al. 2009) and atmospherically deposited aerosols (Hood et al.  
377 2012), both of which appear to be more biologically available than terrestrial sources. Ice glacier  
378 BDOM may be preserved in the ice matrix and physically inaccessible to microbial degradation.  
379 In contrast, rock glacier DOM may be in contact with intraglacial sediments and liquid water,  
380 allowing for further processing through microbial metabolism. In addition, sub-glacial  
381 environments below ice glaciers are often anoxic (Tranter et al. 2005), allowing some  
382 compounds to remain in a chemically reduced state until released with ice melt. This would  
383 allow for rapid metabolism of these energetically-preferable, reduced compounds once unlocked  
384 from the ice and released to an oxic environment (Hood et al. 2009). Thus the production of  
385 DOM within each feature differs and pathways by which that DOM is delivered to the glacial

386 meltwater differ. These mechanisms would result in the differences in the proportion of BDOM  
387 we observed in our bioassays of DOM lability.

388 The molecular structure of glacial DOM from large glaciers has been mechanistically linked to  
389 its lability and shown to be more labile than marine or freshwater derived material due to the  
390 presence of protein and amino-sugar components of microbial origin (Andrilli et al. 2015). This  
391 is consistent with studies from other inland waters that show that higher DOM bioavailability  
392 correlates with enrichment of amino acids and simple sugars (Lafreniere and Sharp 2004;  
393 Williams et al. 2007; Dubnick et al. 2010). Taken together with the results presented here, we  
394 suggest that DOM enriched in amino acids and simple sugars may be a key trait that defines  
395 BDOM and be characteristic of glacial meltwaters worldwide.

#### 396 **Glacier DOM Diversity**

397 The diversity of compounds in organic matter released from glaciers in this study was similar  
398 to the DOM diversity found in other freshwater systems (Dubnick et al. 2010, Guillemette and  
399 del Giorgio 2011, Kellerman et al. 2014). We found that chemical diversity was very similar  
400 between ice glaciers and rock glaciers. However, the diversity of DOM between glacial types  
401 was altered by microbial metabolism in different ways when incubated. Chemical diversity in  
402 incubations with glacial DOM increased during the course of the incubation, whereas chemical  
403 diversity decreased in incubations with rock glacier DOM. This suggests that when BDOM is a  
404 smaller fraction of total DOM, microbial communities may use previously processed DOM to  
405 fuel their own heterotrophic metabolism. This would reduce chemical diversity through the  
406 consumption of primary metabolites (i.e. simple organic acids).

407 Our study expands the understanding of DOM complexity in inland waters by assessing the  
408 glacial contribution of DOM to alpine headwaters and moving beyond broad functional groups

409 and compound classes identification to identification of specific compounds (Dubnick et al.  
410 2010; Fellman et al. 2010; Singer et al. 2012, Fegel et al. 2016). By using a mass spectrometry  
411 based technique we were able to identify individual candidate compounds through metabolomics  
412 paired with total chemical pool complexity. Our results are more detailed, but consistent with  
413 previous analyses that used a fluorescence index (Fegel et al. 2016). Results from Fegel et al.  
414 (2016) showed higher fluorescence index (FI) values in ice glacier meltwaters compared to that  
415 of rock glaciers, indicating a higher presence of proteinaceous (i.e. nitrogen containing)  
416 compounds in ice glacier meltwaters. Here, using metabolomics, we identified higher  
417 proportions of specific amino acids within ice glacier meltwaters compared to rock glaciers that  
418 are likely the cause of the increased FI values observed (Fegel et al. 2016). Application of a  
419 community level analytical approach such as mass spectrometry-based metabolomics provides  
420 the opportunity to disentangle the critically important components of complex DOM pools for  
421 aquatic C cycling, however only a few studies have used metabolomic approaches to address the  
422 bioavailability of DOM as a heterotrophic subsidy (see Kujawinski 2011 for a review; Logue et  
423 al. 2015).

424 Whereas our results provide unambiguous evidence that differences in bioavailability are due  
425 to chemical differences between DOM that differ in origin from glacier types, some components  
426 of the DOM pool are likely not assessed by the GC-MS we employed. GC-MS measures  
427 molecules up to 1200 amu with electron impact ionization, leaving larger molecules unidentified.  
428 Further, some of the components important for glacial C processing could not be identified using  
429 the most current databases. While we were unable to determine exactly what those compounds  
430 were, we are able to say what they were not. Many of the unannotated compounds that were  
431 significantly different between glaciers and rock glaciers had m/z (mass to charge ratio) values

432 greater than 200 (Table 2), indicative of secondary metabolites with large molecular weights  
433 relative to primary metabolites, most of which have mass to charge (m/z) values between 60 and  
434 205. Products of primary metabolism, e.g. amino acids, organic acids, sugars and peptides are  
435 well represented in mass spectrometry databases and therefore more easily identified with a GC-  
436 MS approach. Less well represented are larger molecular weight products of secondary  
437 metabolism such as terpenes, alkaloids, polyketides, aromatic structures, and products of mixed  
438 biosynthesis. Known metabolites are often a small portion of data obtained through mass  
439 spectrometry (<10%), with much of the data reflecting unknown metabolites or those yet to be  
440 verified with standards (Jansson et al. 2009). Yet, the quality of mass spectrometry databases and  
441 representation is rapidly improving, and this will likely be a critically important source of  
442 information for understanding the relationship between molecular composition of DOM and its  
443 lability in future research. The high proportion of compounds that could not be annotated with  
444 candidate assignments in our study reflects the infancy of using mass spectrometry databases in  
445 environmental applications. It exposes the need for more environmentally derived spectra and  
446 standards from secondary metabolism to be added to the current metabolite databases. With the  
447 expansion of metabolic databases, and the verification of environmentally-derived spectra to  
448 known standard compounds, metabolomic techniques will provide the ability to directly assess  
449 the functionality of in situ metabolic pathways from natural systems.

#### 450 **Distribution of Glaciers and Rock Glaciers**

451 Complete mapping of rock glaciers has only been completed for the contiguous United States  
452 and portions of South America, yet early results suggest rock glaciers may be exceptionally more  
453 abundant than ice glaciers in headwater ecosystems (Falaschi et al. 2013; Rangecroft et al. 2015;  
454 Fegel et al. 2016). In addition to their ubiquity, rock glacier derived DOM may contribute to

455 ecosystem productivity for much longer than ice glaciers due to the slower recession of rock  
456 glaciers compared to ice glaciers (Woo 2012). At similar carbon concentrations and with only  
457 ~15% less BDOM (~37% in rock glaciers compared to 52% in glacier derived DOM), as  
458 observed in our study, rock glaciers may play a role in heterotrophic metabolism of alpine  
459 headwaters. Current glacial carbon modeling neglects the contribution of rock glacial carbon  
460 (Hood et al. 2015), yet our results suggest that rock glaciers supply a significant source of  
461 organic matter for metabolism and will continue to do so for decades to come.

462 In conclusion, the work presented here suggests that as long as the cryosphere is present,  
463 DOM entering alpine streams and lakes from both glacier and rock glaciers is likely to continue  
464 to contribute to ecosystem heterotrophy during summer melt. We found clear differences in the  
465 proportion of BDOM and microbial growth efficiency between glacier and rock glaciers DOM.  
466 This suggests a higher potential for secondary production in systems with glacial headwaters  
467 compared to those with rock glacier headwaters. The applicability of metabolomics to the  
468 analysis of natural DOM provides the potential to expand the application of our results for the  
469 prediction of BDOM beyond glaciated ecosystems to a broad range of inland waters. At the same  
470 time our approach exposes the need for better metabolite database development for ecological  
471 metabolomic approaches. In the coming decades, the DOM inputs to alpine lakes and streams  
472 will increasingly be dominated by rock glacier-like DOM inputs, as ice glaciers are lost and rock  
473 glaciers continue to contribute to alpine hydrology due to their slower ablation rates. Despite  
474 differences in chemical compounds and BDOM pool sizes between glacier types, both glaciers  
475 and rock glaciers represent an important heterotrophic subsidy of organic carbon to alpine  
476 headwaters that will fuel ecosystems processes from the bottom up for years to come.  
477

478 **References**

479 Amon, Rainer MW, and Ronald Benner. "Bacterial utilization of different size classes of  
480 dissolved organic matter." *Limnology and Oceanography* 41.1 (1996): 41-51.

481  
482 Andrilli, Juliana, et al. "An ultrahigh-resolution mass spectrometry index to estimate natural  
483 organic matter lability." *Rapid Communications in Mass Spectrometry* 29.24 (2015): 2385-2401.

484  
485 Benner, Ronald. "Chemical composition and reactivity." *Biogeochemistry of marine dissolved  
486 organic matter* 3 (2002): 56-90.

487  
488 Berggren, Martin, and Paul A. Giorgio. "Distinct patterns of microbial metabolism associated to  
489 riverine dissolved organic carbon of different source and quality." *Journal of Geophysical  
490 Research: Biogeosciences* (2015).

491  
492 Berner, Robert A. *Early diagenesis: A theoretical approach*. No. 1. Princeton University Press,  
493 1980.

494  
495 Berthling, Ivar. "Beyond confusion: Rock glaciers as cryo-conditioned  
496 landforms." *Geomorphology* 131.3 (2011): 98-106.

497  
498 Borsheim, Knut Yngve, and Gunnar Bratbak. "Cell volume to cell carbon conversion factors for  
499 a bacterivorous *Monas* sp. enriched from seawater." *Mar. Ecol. Prog. Ser* 36.17 (1987): 11.

500

501 Broeckling, Corey David, et al. "RAMClust: A Novel Feature Clustering Method Enables  
502 Spectral-Matching-Based Annotation for Metabolomics Data." *Analytical chemistry* 86.14  
503 (2014): 6812-6817.

504

505 Burga, Conradin A., et al. "Vegetation on Alpine rock glacier surfaces: a contribution to  
506 abundance and dynamics on extreme plant habitats." *Flora-Morphology, Distribution,  
507 Functional Ecology of Plants* 199.6 (2004): 505-515.

508

509 Cannone, Nicoletta, and Renato Gerdol. "Vegetation as an ecological indicator of surface  
510 instability in rock glaciers." *Arctic, Antarctic, and Alpine Research* 35.3 (2003): 384-390.

511

512 Del Giorgio, Paul A., and Jonathan J. Cole. "Bacterial growth efficiency in natural aquatic  
513 systems." *Annual Review of Ecology and Systematics* (1998): 503-541.

514

515 Derenne, Sylvie, and Thanh Thuy Nguyen Tu. "Characterizing the molecular structure of organic  
516 matter from natural environments: An analytical challenge." *Comptes Rendus Geoscience* 346.3  
517 (2014): 53-63.

518

519 Dittmar, Thorsten, et al. "A simple and efficient method for the solid-phase extraction of  
520 dissolved organic matter (SPE-DOM) from seawater." *Limnology and Oceanography:  
521 Methods* 6.6 (2008): 230-235.

522

523 Dubnick, Ashley, et al. "Characterization of dissolved organic matter (DOM) from glacial  
524 environments using total fluorescence spectroscopy and parallel factor analysis." *Annals of*  
525 *Glaciology* 51.56 (2010): 111-122.  
526

527 Falaschi, Daniel, et al. "First glacier inventory and recent changes in glacier area in the Monte  
528 San Lorenzo region (47 S), Southern Patagonian Andes, South America." *Arctic, Antarctic, and*  
529 *Alpine Research* 45.1 (2013): 19-28.  
530

531 Fegel, T. S., Baron, J. S., Fountain, A. G., Johnson, G. F., & Hall, E. K. (2016). The differing  
532 biogeochemical and microbial signatures of glaciers and rock glaciers. *Journal of Geophysical*  
533 *Research: Biogeosciences*.  
534

535 Fellman, Jason B., Eran Hood, and Robert GM Spencer. "Fluorescence spectroscopy opens new  
536 windows into dissolved organic matter dynamics in freshwater ecosystems: A  
537 review." *Limnology and Oceanography* 55.6 (2010): 2452-2462.  
538

539 Fellman, Jason B., et al. "The impact of glacier runoff on the biodegradability and biochemical  
540 composition of terrigenous dissolved organic matter in near-shore marine ecosystems." *Marine*  
541 *Chemistry* 121.1 (2010): 112-122.  
542

543 Fellman, Jason B., et al. "Evidence for the assimilation of ancient glacier organic carbon in a  
544 proglacial stream food web." *Limnology and Oceanography* (2015).  
545



546 Guenet, Bertrand, et al. "Priming effect: bridging the gap between terrestrial and aquatic  
547 ecology." *Ecology* 91.10 (2010): 2850-2861.  
548

549 Guillemette, François, and Paul A. del Giorgio. "Reconstructing the various facets of dissolved  
550 organic carbon bioavailability in freshwater ecosystems. " *Limnology and Oceanography* 56.2  
551 (2011): 734-748.  
552

553 Hedges, John I., et al. "The molecularly-uncharacterized component of nonliving organic matter  
554 in natural environments." *Organic Geochemistry* 31.10 (2000): 945-958.  
555

556 Hilker, Monika. "New synthesis: parallels between biodiversity and chemodiversity." *Journal of*  
557 *chemical ecology* 40.3 (2014): 225-226.  
558

559 Hobbie, J. El, R. Jasper Daley, and STTI977 Jasper. "Use of nuclepore filters for counting  
560 bacteria by fluorescence microscopy." *Applied and environmental microbiology* 33.5 (1977):  
561 1225-1228.  
562

563 Hockaday, William C., et al. "Electrospray and photoionization mass spectrometry for the  
564 characterization of organic matter in natural waters: a qualitative assessment." *Limnology and*  
565 *Oceanography: Methods* 7.1 (2009): 81-95.  
566

567 Hood, Eran, et al. "Glaciers as a source of ancient and labile organic matter to the marine  
568 environment." *Nature* 462.7276 (2009): 1044-1047.

569

570 Hood, Eran, et al. "Storage and release of organic carbon from glaciers and ice sheets." *Nature*

571 *Geoscience* 8.2 (2015): 91-96.

572

573 Jansson, Janet, et al. "Metabolomics reveals metabolic biomarkers of Crohn's disease." *PloS*

574 *one* 4.7 (2009): e6386.

575

576 Kellerman, Anne M., et al. "Chemodiversity of dissolved organic matter in lakes driven by

577 climate and hydrology." *Nature communications* 5 (2014).

578

579 Kellerman, Anne M., et al. "Persistence of dissolved organic matter in lakes related to its

580 molecular characteristics." *Nature Geoscience* 8.6 (2015): 454-457.

581

582 Kim, Sunghwan, Louis A. Kaplan, and Patrick G. Hatcher. "Biodegradable dissolved organic

583 matter in a temperate and a tropical stream determined from ultra-high resolution mass

584 spectrometry." *Limnology and Oceanography* 51.2 (2006): 1054-1063.

585

586 Kujawinski, Elizabeth B. "The impact of microbial metabolism on marine dissolved organic

587 matter." *Annual review of marine science* 3 (2011): 567-599.

588

589 Lafrenière, Melissa J., and Martin J. Sharp. "The concentration and fluorescence of dissolved

590 organic carbon (DOC) in glacial and nonglacial catchments: interpreting hydrological flow

591 routing and DOC sources." *Arctic, Antarctic, and Alpine Research* 36.2 (2004): 156-165.

592

593 Logue, Jürg B., et al. "Experimental insights into the importance of aquatic bacterial community  
594 composition to the degradation of dissolved organic matter." *The ISME journal* (2015).

595

596 Pierce, Alan Eugene. "Silylation of organic compounds." (1968).

597

598 R Core Team (2014). R: A language and environment for statistical  
599 computing. R Foundation for Statistical Computing, Vienna, Austria. URL [http://www.R-](http://www.R-project.org/)  
600 [project.org/](http://www.R-project.org/).

601

602 Rangecroft, S., S. Harrison, and K. Anderson. "Rock glaciers as water stores in the Bolivian  
603 Andes: an assessment of their hydrological importance." *Arctic, Antarctic, and Alpine*  
604 *Research* 47.1 (2015): 89-98.

605

606 Rovira, Pere, and V. Ramón Vallejo. "Labile and recalcitrant pools of carbon and nitrogen in  
607 organic matter decomposing at different depths in soil: an acid hydrolysis  
608 approach." *Geoderma* 107.1 (2002): 109-141.

609

610 Shannon, C. E. "A Mathematical Theory of Communication-An Integrated Approach." (1948).

611

612 Singer, Gabriel A., et al. "Biogeochemically diverse organic matter in Alpine glaciers and its  
613 downstream fate." *Nature Geoscience* 5.10 (2012): 710-714.

614 Stibal, Marek, et al. "Organic matter content and quality in supraglacial debris across the ablation  
615 zone of the Greenland ice sheet." *Annals of Glaciology* 51.56 (2010): 1-8.  
616

617 Stubbins, Aron, et al. "Anthropogenic aerosols as a source of ancient dissolved organic matter in  
618 glaciers." *Nature Geoscience* 5.3 (2012): 198-201.  
619

620 Sumner, Lloyd W., et al. "Proposed minimum reporting standards for chemical  
621 analysis." *Metabolomics* 3.3 (2007): 211-221.  
622

623 Tranter, Martyn, Mark Skidmore, and Jemma Wadham. "Hydrological controls on microbial  
624 communities in subglacial environments." *Hydrological Processes* 19.4 (2005): 995-998.  
625

626 Volk, Christian J., Catherine B. Volk, and Louis A. Kaplan. "Chemical composition of  
627 biodegradable dissolved organic matter in streamwater." *Limnology and Oceanography* 42.1  
628 (1997): 39-44.  
629

630 Wahrhaftig, Clyde, and Allan Cox. "Rock glaciers in the Alaska Range." *Geological Society of  
631 America Bulletin* 70.4 (1959): 383-436.  
632

633 Wetzel, Robert G. "Gradient-dominated ecosystems: sources and regulatory functions of  
634 dissolved organic matter in freshwater ecosystems." *Dissolved organic matter in lacustrine  
635 ecosystems*. Springer Netherlands, 1992. 181-198.  
636

637 Williams, M. W., et al. "Nitrate content and potential microbial signature of rock glacier outflow,  
638 Colorado Front Range." *Earth Surface Processes and Landforms* 32.7 (2007): 1032-1047.

639

640 Woo, Ming-ko. *Permafrost hydrology*. Springer Science & Business Media, 2012.

641

642

643

644 ***Acknowledgements***

645 The authors would like to thank Edward Stets and Ann Hess for their for help with DOM pool  
646 modeling, Corey Broeckling and Sarah Lyons for their help interpreting metabolomic data, and

647 Gunnar Johnson for his help in the field and with figures. This project is a product of the

648 Western Mountain Initiative (WMI) and is funded by the United States Geological Survey.

649 Edward K Hall was supported by NSF award DEB#1456959 during the preparation of this

650 manuscript. All data are available to the public and reside with Loch Vale Watershed long-term

651 ecological research and monitoring program database at

652 <http://www.nrel.colostate.edu/projects/lvws/data.html>.

653

654 **Figure Legends**

655

656 **Figure 1 A)** Stars note the approximate location of each glacier feature that was sampled for this  
657 study within the state of Colorado. In total four pairs of glaciers and rock glaciers were sampled  
658 along the Front Range of Colorado. **(B) Isabelle Glacier and Navajo Rock Glacier** form a pair  
659 of a glacier and a rock glacier from the same watershed are shown here to illustrate the  
660 differences between the two types of features.

661

662

663 **Figure 2 PCA GC-MS Analysis DOM compounds A)** PCA plots showing separation along PC5  
664 between glaciers (blue) and rock glaciers (red) before incubation and **B)** no significant difference  
665 between glacier types after incubation (p-value of 0.119 and 0.0681 for PC1 and PC2,  
666 respectively). **C)** The Shannon-Wiener Index (SW) for chemical diversity was similar between  
667 glaciers and rock glaciers before incubation, however microbial metabolism increased chemical  
668 diversity in glacier DOM and decreased chemical diversity in rock glacier DOM.

669

670

671 **Figure 3 Molecular distribution of GC-MS identified compounds A)** Distribution of  
672 compounds by ion intensity pre- (orange) and post-incubation (brown). Many of the compounds  
673 present before incubation that were of intermediate abundance were metabolized. The most  
674 abundant molecules were different between pre- and post- incubation metabolomics analysis (see  
675 Table 4).

676

677

678 **Figure 4** Dissolved oxygen consumption curves from glaciated watersheds (n=8). Values were  
679 averaged for each of the glaciers (blue) and rock glaciers (red), and the analytical control (dotted  
680 black). All curves were smoothed using a third order polynomial regression function ( $R^2=0.999$ ).  
681 Here we show 95% Confidence Intervals in light blue for glaciers and in pink for rock glaciers.  
682 Glaciers consumed a larger portion of available DOM during the course of the incubation.

683  
684  
685  
686  
687  
688  
689

690

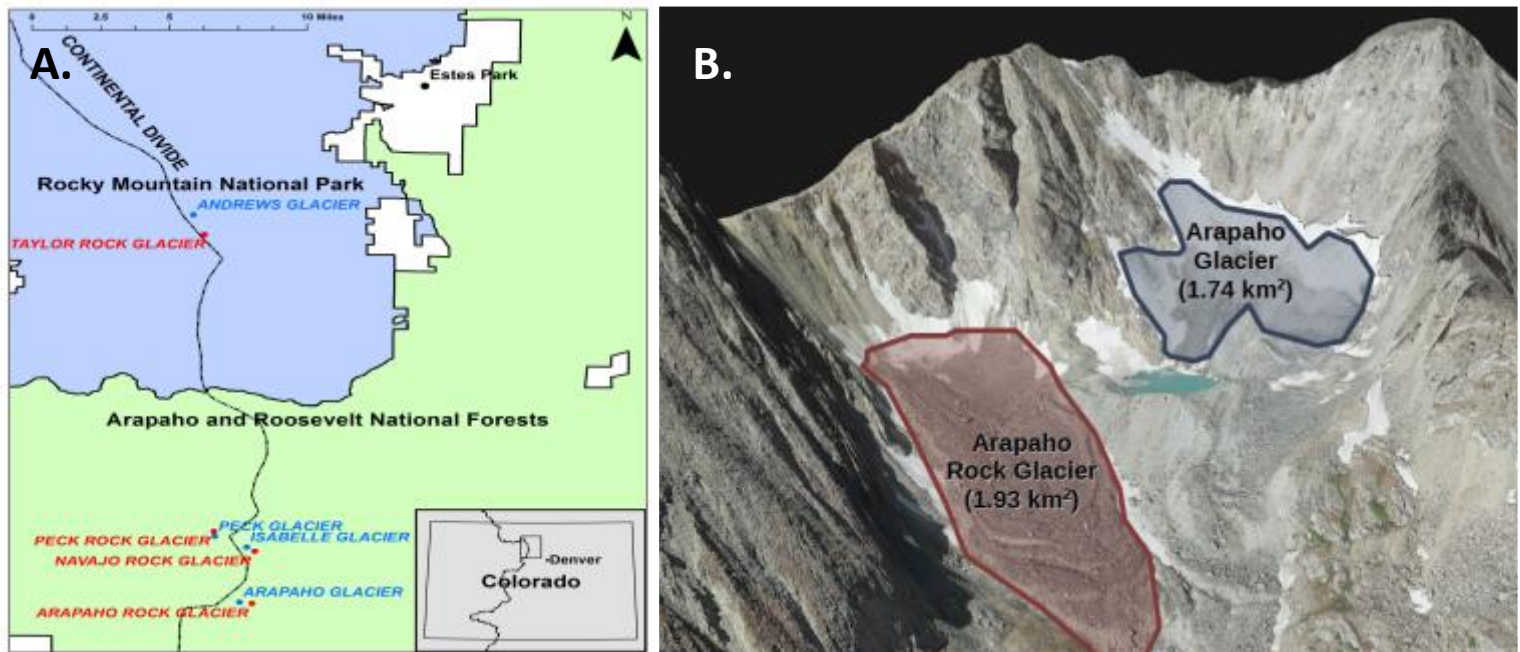

692 **Figure 1 A)** Stars note the approximate location of each glacier feature that was sampled for this  
693 study within the state of Colorado. In total four pairs of glaciers and rock glaciers were sampled  
694 along the Front Range of Colorado. **(B) Isabelle Glacier and Navajo Rock Glacier** form a pair  
695 of a glacier and a rock glacier from the same watershed are shown here to illustrate the  
696 differences between the two types of features.

697

698

699



700  
701

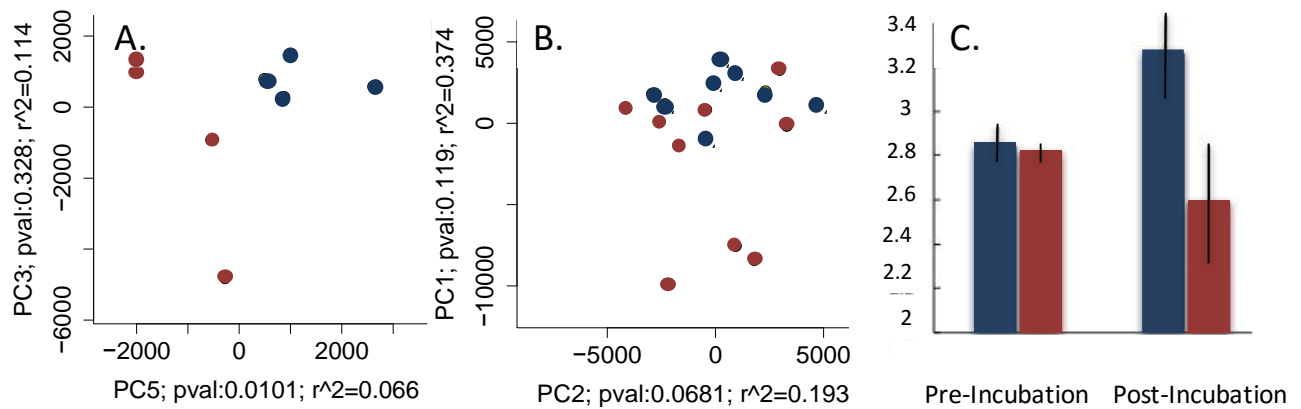

702  
703

704 **Figure 2** PCA GC-MS Analysis DOM compounds **A)** PCA plots showing separation along PC5  
705 between glaciers (blue) and rock glaciers (red) before incubation and **B)** no significant difference  
706 between glacier types after incubation (p-value of 0.119 and 0.0681 for PC1 and PC2,  
707 respectively). **C)** The Shannon-Wiener Index (SW) for chemical diversity was similar between  
708 glaciers and rock glaciers before incubation, however microbial metabolism increased chemical  
709 diversity in glacier DOM and decreased chemical diversity in rock glacier DOM.

710  
711

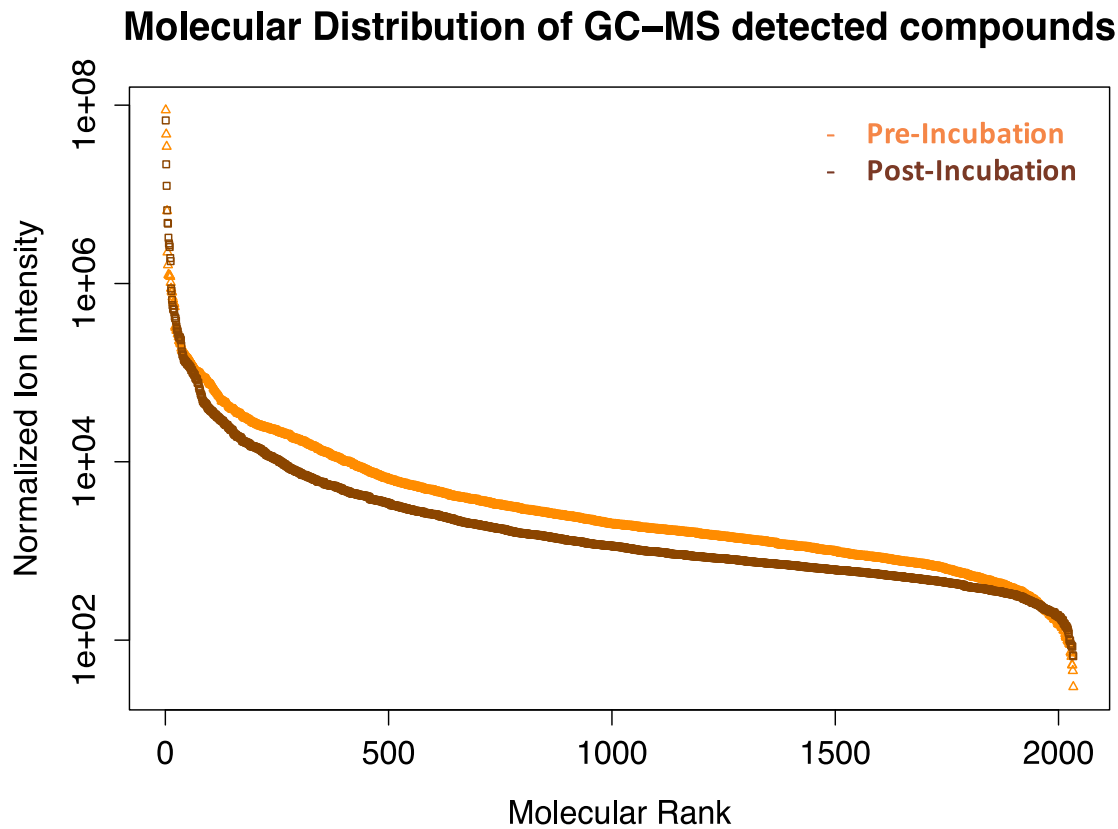

**Figure**

713 **Figure 3 Molecular distribution of GC-MS identified compounds A)** Distribution of  
714 compounds by ion intensity pre- (orange) and post-incubation (brown). Many of the compounds  
715 present before incubation that were of intermediate abundance were metabolized. The most  
716 abundant molecules were different between pre- and post- incubation metabolomics analysis (see  
717 Table 4).

718  
719  
720  
721

722

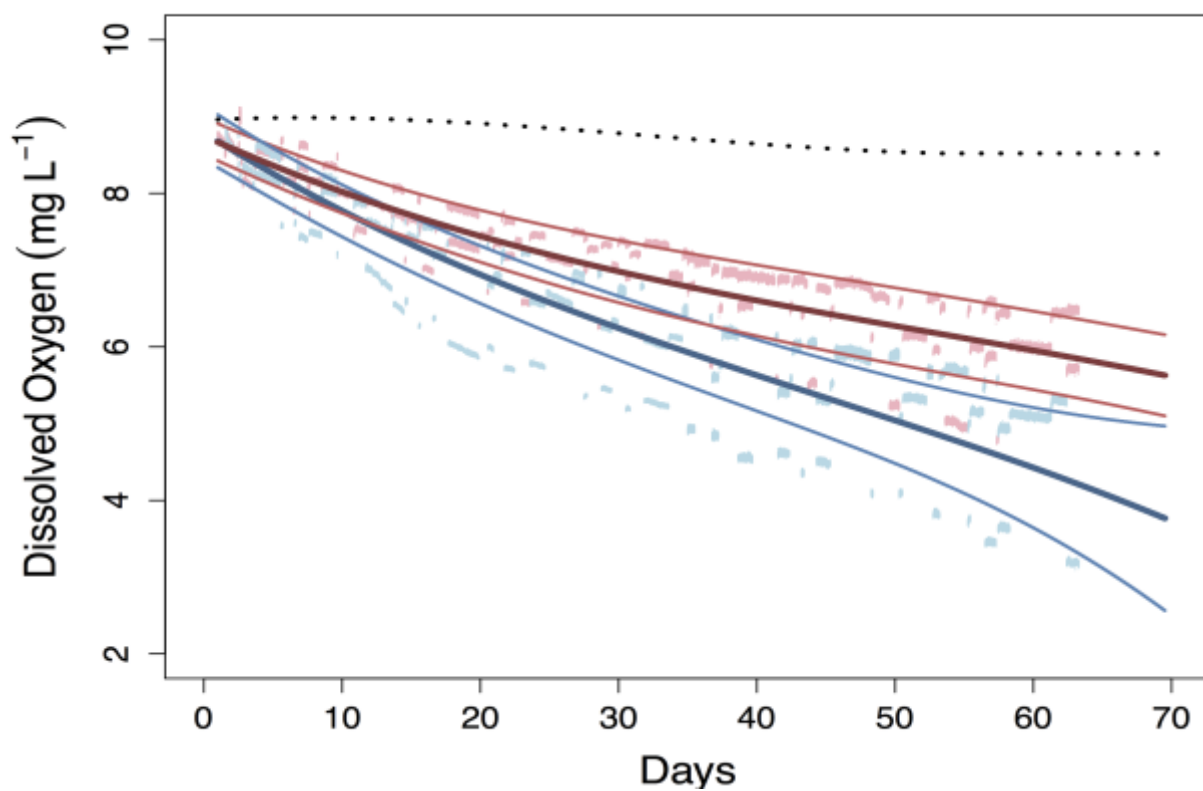

723 **Figure 4** Dissolved oxygen consumption curves from glaciated watersheds (n=8). Values were  
724 averaged for each of the glaciers (blue) and rock glaciers (red), and the analytical control (dotted  
725 black). All curves were smoothed using a third order polynomial regression function ( $R^2=0.999$ ).  
726 Here we show 95% Confidence Intervals in light blue for glaciers and in pink for rock glaciers.  
727 Glaciers consumed a larger portion of available DOM during the course of the incubation.

728  
729  
730  
731  
732  
733  
734  
735  
736  
737  
738  
739  
740  
741  
742  
743  
744  
745  
746  
747  
748  
749  
750  
751  
752  
753  
754  
755  
756  
757  
758  
759  
760  
761  
762  
763

764 **Tables**

765

766 **Table 1** Characteristics of DOM and microbial metabolism fed DOM from glaciers and rock

767 glaciers. C:N is the ratio of carbon to nitrogen for pre-incubation DOM. D.O (dissolved oxygen)

768 and DOC (dissolved organic carbon) represent the change in concentration of each during the

769 course of the incubation (mg L<sup>-1</sup>). RQ = respiratory quotient, SW = Shannon Wiener Diversity

770 Index, and  $\Delta$ SW = change in SW of DOM before and after the incubation. Bold values represent

771 significant differences between glaciers and rock glaciers (p<0.05), standard deviations of mean

772 values are listed in parentheses.

773

| Site     | Type | C:N         | D.O.        | DOC         | RQ          | SW          | $\Delta$ SW |
|----------|------|-------------|-------------|-------------|-------------|-------------|-------------|
| Isabelle | G    | 1.65        | 6.03        | 2.50        | 0.42        | 2.92        | 0.19        |
| Peck     | G    | 2.02        | 3.95        | 1.89        | 0.48        | 2.89        | 0.88        |
| Andrews  | G    | 3.00        | 4.11        | 2.64        | 0.64        | 2.68        | 0.13        |
| Arapaho  | G    | 2.73        | 3.97        | 2.84        | 0.72        | 2.84        | 0.52        |
| Peck     | RG   | 2.63        | 3.52        | 2.09        | 0.59        | 2.80        | 0.54        |
| Navajo   | RG   | 1.48        | 2.81        | 1.71        | 0.61        | 2.83        | -0.32       |
| Arapaho  | RG   | 2.45        | 4.12        | 3.00        | 0.73        | 2.79        | -1.10       |
| Taylor   | RG   | 0.86        | 2.69        | 2.25        | 0.83        | 2.80        | -0.01       |
| Mean     | G    | 2.35 (0.62) | 4.51 (1.02) | 2.47 (0.41) | 0.56 (0.14) | 2.83 (0.11) | <b>0.43</b> |
| Mean     | RG   | 1.85 (0.83) | 3.29 (0.67) | 2.26 (0.54) | 0.69 (0.11) | 2.80 (0.02) | -0.22       |

774

775

776  
777 **Table 2** DOM compounds that defined the differences between glaciers and rock glaciers before  
778 incubation along PC5 from Figure 3A. Mass to charge ratios (m/z) ratios are the largest ion  
779 observed for each compound. Normalized intensities (N.I.), an indicator of compound  
780 concentration, are given for glaciers and rock glaciers. Bold values indicate which glacier type  
781 had a higher normalized intensity (N.I) on average.

782  
783

| DOM Peak      | m/z   | N.I. Glacier | N.I. Rock Glacier |
|---------------|-------|--------------|-------------------|
| Maltose       | 568.3 | <b>4817</b>  | 2201              |
| Glutamate     | 365.3 | <b>5393</b>  | 2704              |
| C996          | 94.2  | <b>28959</b> | 3589              |
| C884          | 565.3 | <b>14584</b> | 1468              |
| C815          | 419.1 | <b>2486</b>  | 569               |
| C1890         | 613.2 | <b>805</b>   | 346               |
| C1870         | 642   | <b>1516</b>  | 1229              |
| C1840         | 640.1 | <b>384</b>   | 245               |
| C1739         | 489.1 | <b>2407</b>  | 1376              |
| C1655         | 480.2 | <b>17313</b> | 9597              |
| C1414         | 507.2 | <b>550</b>   | 479               |
| Threonic Acid | 411   | 117          | <b>2730</b>       |
| Quinic Acid   | 409.2 | 2136         | <b>7891</b>       |
| Glycolic Acid | 279.2 | 2920         | <b>16696</b>      |
| C589          | 649.5 | 1605         | <b>1868</b>       |
| C531          | 343.2 | 7446         | <b>22845</b>      |
| C35           | 348.2 | 1422         | <b>2188</b>       |
| C1942         | 535.1 | 846          | <b>1062</b>       |
| C1439         | 406.2 | 598          | <b>861</b>        |
| C1376         | 440.2 | 2623         | <b>3610</b>       |
| C1226         | 634.1 | 708          | <b>1602</b>       |
| C1125         | 468.1 | 3550         | <b>7504</b>       |

784  
785  
786

787 **Table 3** Results from carbon decay model where  $B_0$  represents the size of the recalcitrant pool of  
 788 DOM ( $\text{mg C L}^{-1}$ ),  $B_1$  is the size of the bioavailable pool ( $\text{mg C L}^{-1}$ ),  $k$  is the decay constant ( $\text{mg}$   
 789  $\text{C L}^{-1} \text{ h}^{-1}$ ), and  $BGE$  = bacterial growth efficiency. Glaciers had a larger percentage of BDOM  
 790 compared to rock glaciers and rock glaciers had a larger proportion of recalcitrant C compared to  
 791 glaciers.  $BGE$  was also higher for glaciers than rock glaciers. Bold values represent significant  
 792 differences between glaciers and rock glaciers ( $p < 0.05$ ) and standard deviations of mean values  
 793 are listed in parentheses.

794  
 795  
 796

| Site     | Type         | $B_0$              | $B_1$              | $k$              | % BDOM              | % Recalcitrant      | BGE                 |
|----------|--------------|--------------------|--------------------|------------------|---------------------|---------------------|---------------------|
| Andrews  | Glacier      | 3.20               | 5.59               | 0.001            | 48.23               | 51.77               | 0.37                |
| Arapaho  | Glacier      | 3.72               | 5.20               | 0.001            | 47.74               | 52.26               | 0.39                |
| Isabelle | Glacier      | 1.35               | 7.03               | 0.001            | 60.90               | 39.10               | 0.39                |
| Peck     | Glacier      | 3.78               | 5.24               | 0.001            | 46.06               | 53.94               | 0.17                |
| Arapaho  | Rock Glacier | 5.32               | 3.80               | 0.002            | 32.05               | 67.95               | 0.13                |
| Navajo   | Rock Glacier | 5.64               | 3.42               | 0.001            | 29.89               | 70.11               | 0.03                |
| Peck     | Rock Glacier | 3.31               | 5.24               | 0.001            | 45.74               | 54.26               | 0.14                |
| Taylor   | Rock Glacier | 4.69               | 3.83               | 0.001            | 36.59               | 63.41               | 0.07                |
| Mean G   | Glacier      | <b>3.38 (1.09)</b> | <b>6.35 (1.06)</b> | 0.001<br>(0.000) | <b>52.83 (9.73)</b> | <b>47.17 (7.03)</b> | <b>0.263 (0.13)</b> |
| Mean RG  | Rock Glacier | 4.74 (1.26)        | 4.07 (1.12)        | 0.001<br>(0.000) | 37.18 (10.23)       | 62.82 (6.84)        | 0.157 (0.16)        |

797  
 798

799 **Table 4** The top 25 compounds present in pre- and post-incubation samples organized by  
 800 normalized intensity. Glaciers and rock glaciers had the same top 25 compounds before and after  
 801 incubation. Microbial metabolism altered compounds present, resulting in a different set of  
 802 compounds post incubation.

803

| <b>Pre-Incubation</b>                                                       | <b>Post-Incubation</b>                                           |
|-----------------------------------------------------------------------------|------------------------------------------------------------------|
| Succinic Acid                                                               | Glycerol                                                         |
| Octyl 2-propylpentyl ester-phthalic acid                                    | 2,4,6-triethyl-, S-(2-phenylethyl) ester-benzenecarbothioic acid |
| Octyl 2,4,4-trimethylpentyl ester-terephthalic acid                         | Pyroglutamate                                                    |
| 3-chlorophenyl 4-methoxybenzyl ester-succinic acid                          | 10-dioxide-2-phenoxathiinamine-10                                |
| pentadecan-1-ol                                                             | Serine                                                           |
| Hydroxylamine                                                               | 1-Ethoxy-2-propanol                                              |
| Homosalate                                                                  | Palmitic Acid                                                    |
| p-cyanophenyl 4'-heptyl-4-biphenylcarboxylate                               | Sucrose                                                          |
| Scopoletin                                                                  | Beta-alanine                                                     |
| Diiodoacetylene-1                                                           | 2,4,6-tri-tert-butyl-phenol                                      |
| Palmitic Acid                                                               | Aspartate                                                        |
| Diiodoacetylene                                                             | Boric Acid                                                       |
| Phosphoric Acid                                                             | Stearic Acid                                                     |
| (2-amino-5-chlorophenyl)(2-fluorophenyl)-methanone                          | Norleucine                                                       |
| Stearic Acid                                                                | Homoserine                                                       |
| phenyl ester-2-thiophenecarboxylic acid                                     | Glycine                                                          |
| phenylethylmalonamide                                                       | n-pentadecan-1-ol                                                |
| 3-Methyl-3-(N-methyl-2-pyrrolyl)-1,2-diphenylcyclopropene                   | D-pinitol                                                        |
| 5-amino-1,2,3,8-tetramethoxy-deibenz[d,f]cycloheptane                       | N-methoxycarbonyl-, isohexyl ester-l-valine                      |
| Furan-2-carboxylic acid [2-(2,2,6,6-tetramethylpiperidin-4-yl)-ethyl]-amide | 3,5-Di-tert-butyl-4-hydroxybenzoic acid                          |
| 1,3-Dimethyl-2,6-dioxo-2,3,6,7-tetrahydro-1H-purine-8-carbaldehyde-oxime    | 1-ethyl-1H-Benzimidazole                                         |
| p-Cyanophenyl p-(2-butoxyethoxy)benzoate                                    | Phosphoric acid                                                  |
| 2-fluorophenyl 2,4-dimethylpent-3-yl ester-succinic acid                    | Tyrosine                                                         |
| Homoserine                                                                  | Sarcosine                                                        |
| Pre-Incubation                                                              | Post-Incubation                                                  |

804



805  
806  
807  
808  
809  
810  
811  
812  
813
